# Supplementary material for: Vespakinin-M, a natural peptide from Vespa magnifica, promotes functional recovery in stroke mice
Source: PubMed Central journal article supplement (PMC8776894; doi:10.1038/s42003-022-03024-5), 2022-01-20
Supplement: 42003_2022_3024_MOESM3_ESM.pdf [file 42003_2022_3024_MOESM3_ESM.pdf]

## Description of Additional Supplementary Files

**File name:** Supplementary Movie 1

**Description:** FITC-labeled VK (100 nM) was added to each well after 15 min of incubation at 37°C, and live cell images were acquired and processed by confocal microscopy (Zeiss LSM 880). Live cell images were recorded for 90 min.

**File name:** Supplementary Movie 2

**Description:** As a negative group was FITC treated without labeled VK.

**File name:** Supplementary Data 1

**Description:** Source data underlying Figs. 1-9.
